# Supplementary material
Source: JCI journal article supplement (doi:10.1172/jci189901)
Supplement: sd2 [file 2]

Supplementary Fig 7e  
unedited images

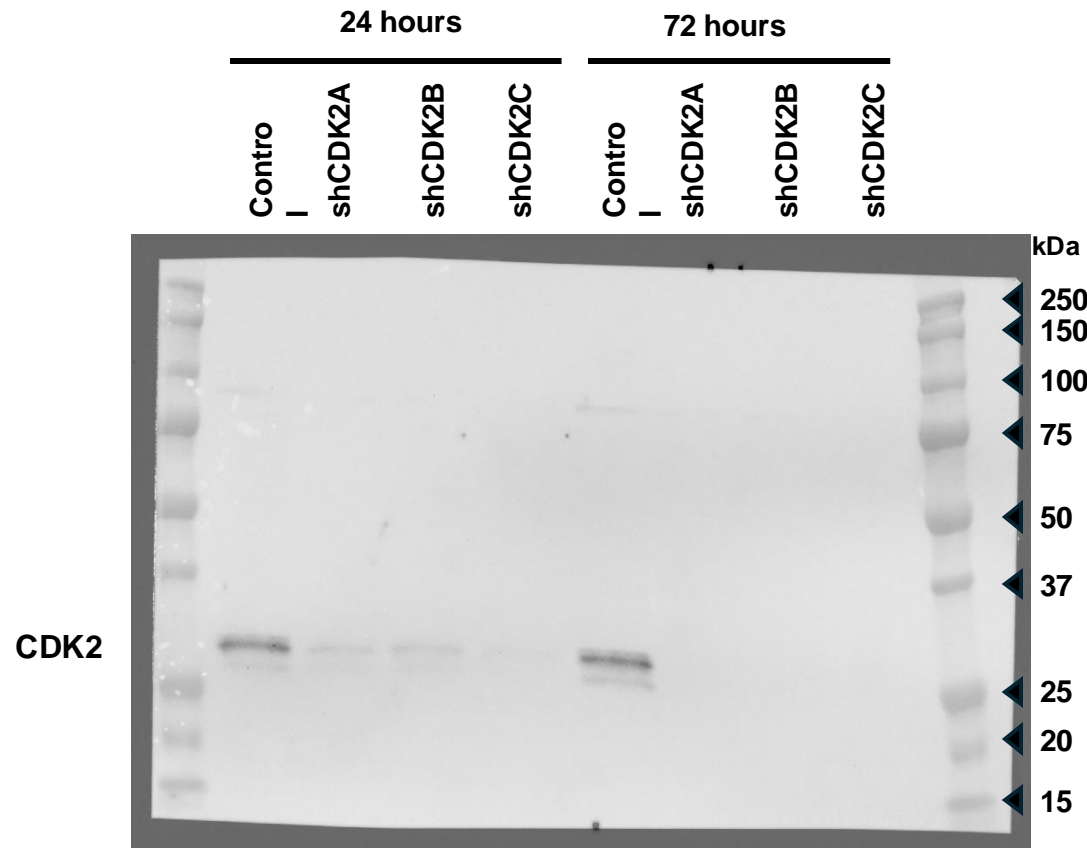

Primary antibody: CDK2 (#ab32147, Abcam)  
Second antibody: goat anti-rabbit IgG (#1706516, Bio-RAD)

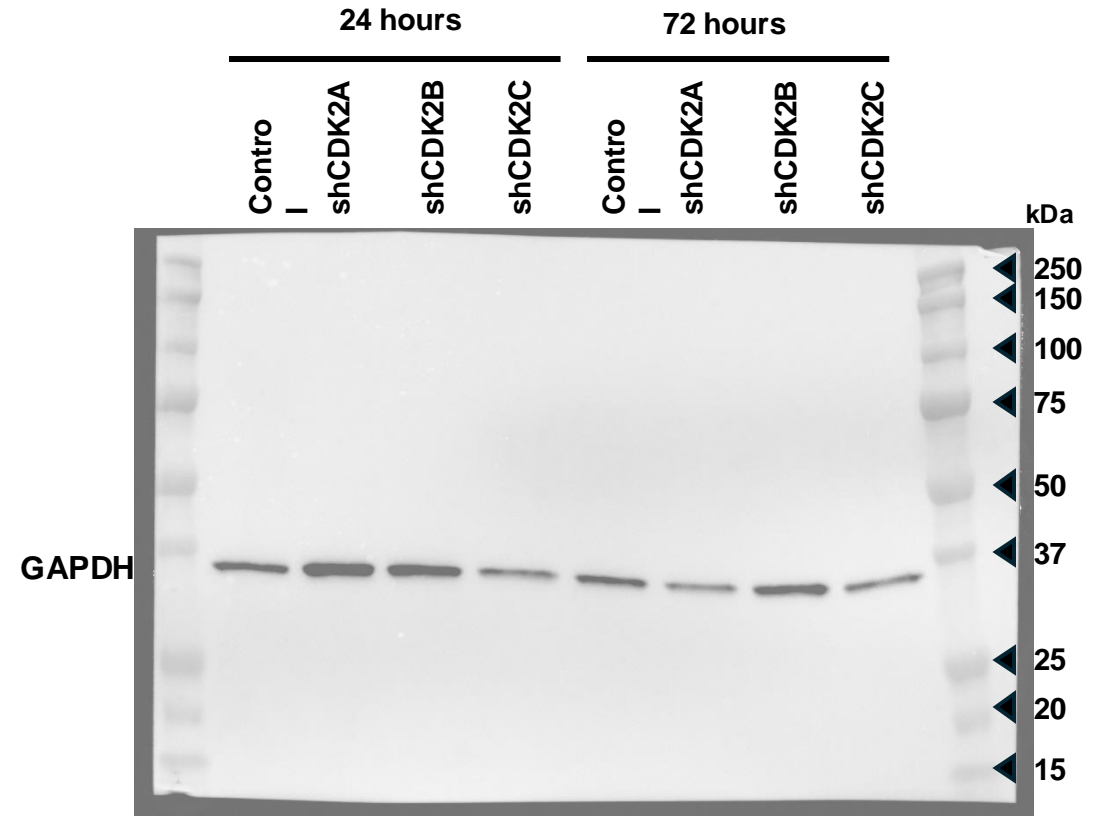

Primary antibodies: GAPDH (#14C10, Cell Signaling Technology)  
Second antibody: goat anti-rabbit IgG (#1706516, Bio-RAD)
